# Supplementary material
Source: publisher figshare collection journal article supplement (https://tandf.figshare.com/ndownloader/files/31581156)

**SUPPLEMENTARY MATERIAL**

**One new phenylpropanoidglycoside from *Myxopyrum smilacifolium***

**with *α*-glucosidase inhibitory activity**

Nguyen Quoc Vuong*, Vu Van Chien, Nguyen Thi Hue, Pham Thi Hang,
Nguyen Hoai Nam, Pham Van Cuong, Nguyen Xuan Nhiem*

Institute of Marine Biochemistry, Vietnam Academy of Science and Technology, 18 Hoang Quoc Viet, Caugiay, Hanoi, Vietnam

Correspondence to:

**Nguyen Quoc Vuong, Prof. Ph.D.**

Institute of Marine Biochemistry, Vietnam Academy of Science and Technology

18 Hoang Quoc Viet, Cau Giay, Hanoi, Vietnam

E-mail address: nguyenvh62@gmail.com

**Nguyen Xuan Nhiem, Prof. Ph.D.**

Institute of Marine Biochemistry, Vietnam Academy of Science and Technology

18 Hoang Quoc Viet, Cau Giay, Hanoi, Vietnam

E-mail address: nxnhiem@yahoo.com

**Content**

[**1.** HR-ESI-MS of compound **1** 1](#__RefHeading___Toc83746733)

[**2.** UV spectrum of compound **1** 1](#__RefHeading___Toc83746734)

[**3.** IR spectrum of compound **1** 2](#__RefHeading___Toc83746735)

[**4.** 1H-NMR spectrum of compound **1** 2](#__RefHeading___Toc83746736)

[**5.** 1H-NMR spectrum of compound **1** (Zoomed) 3](#__RefHeading___Toc83746737)

[**6.** 13C-NMR spectrum of compound **1** 4](#__RefHeading___Toc83746738)

[**7.** 13C-NMR spectrum of compound **1** (Zoomed) 4](#__RefHeading___Toc83746739)

[**8.** DEPT spectrum of compound **1** 5](#__RefHeading___Toc83746740)

[**9.** HSQC spectrum of compound **1** 5](#__RefHeading___Toc83746741)

[**10.** HMBC spectrum of compound **1** 6](#__RefHeading___Toc83746742)

[**11.** COSY spectrum of compound **1** 6](#__RefHeading___Toc83746743)

[**12.** NOESY spectrum of compound **1** 7](#__RefHeading___Toc83746744)

# HR-ESI-MS of compound **1**

# UV spectrum of compound **1**


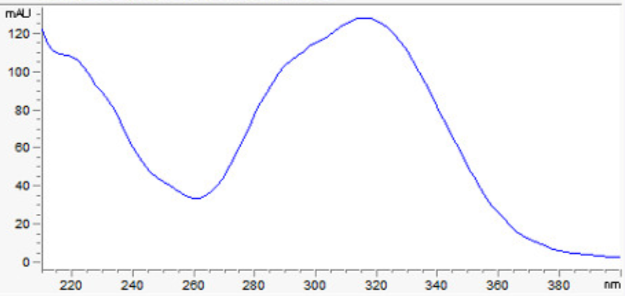


# IR spectrum of compound **1**

# 1H-NMR spectrum of compound **1**


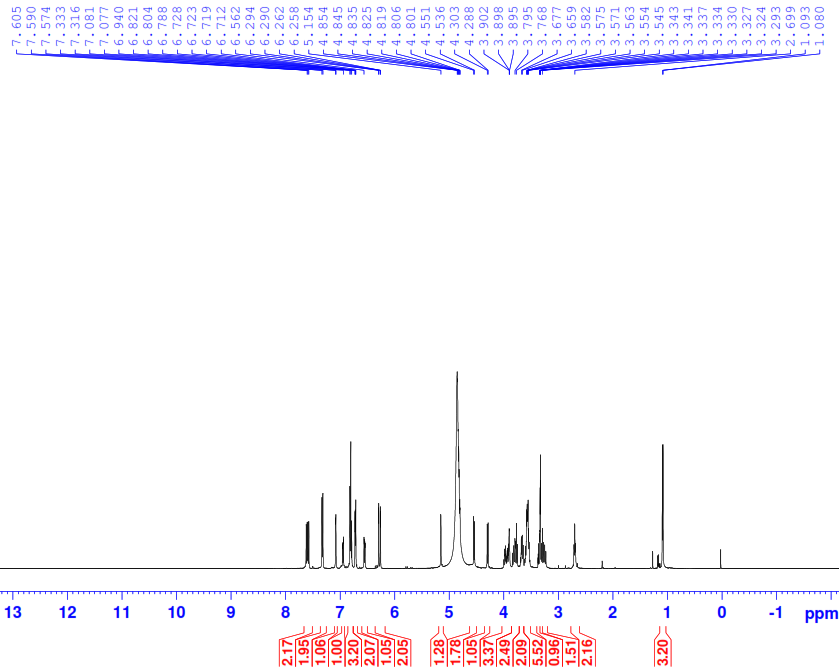


# 1H-NMR spectrum of compound **1** (Zoomed)


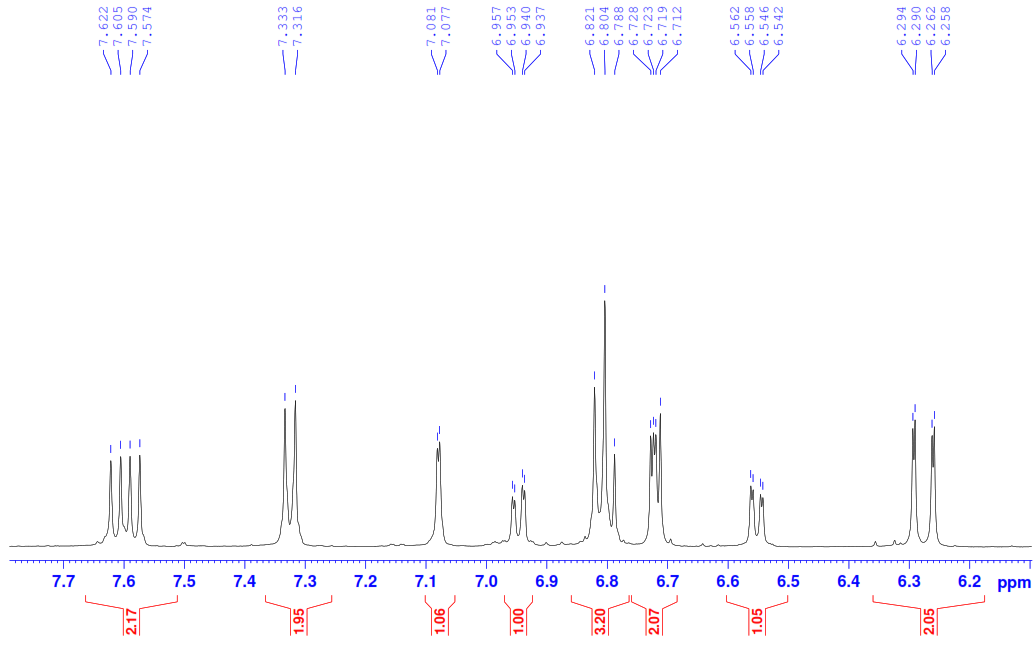


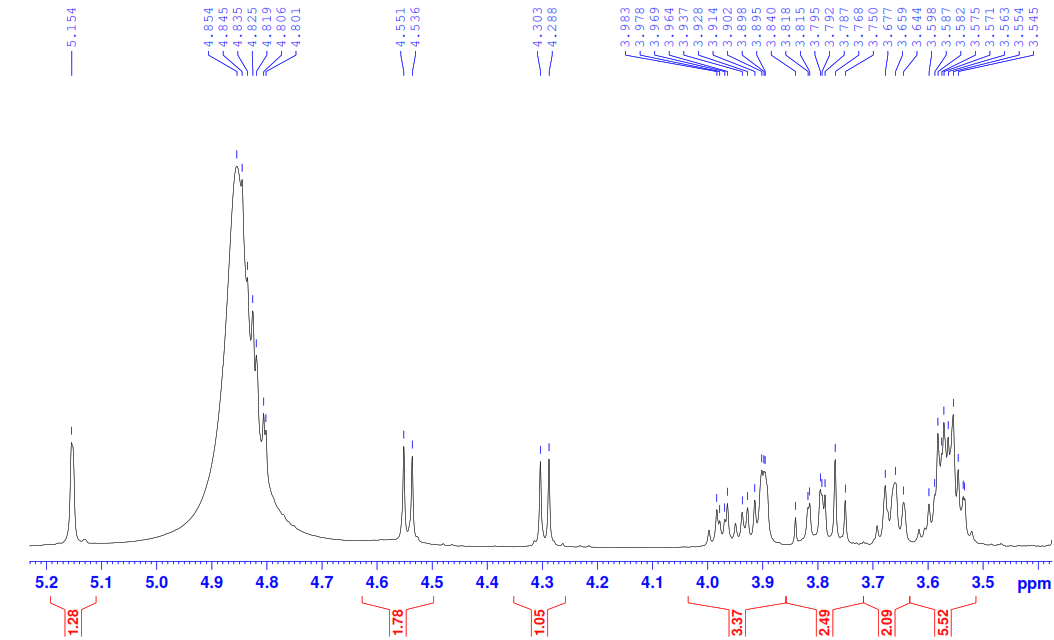


# 13C-NMR spectrum of compound **1**


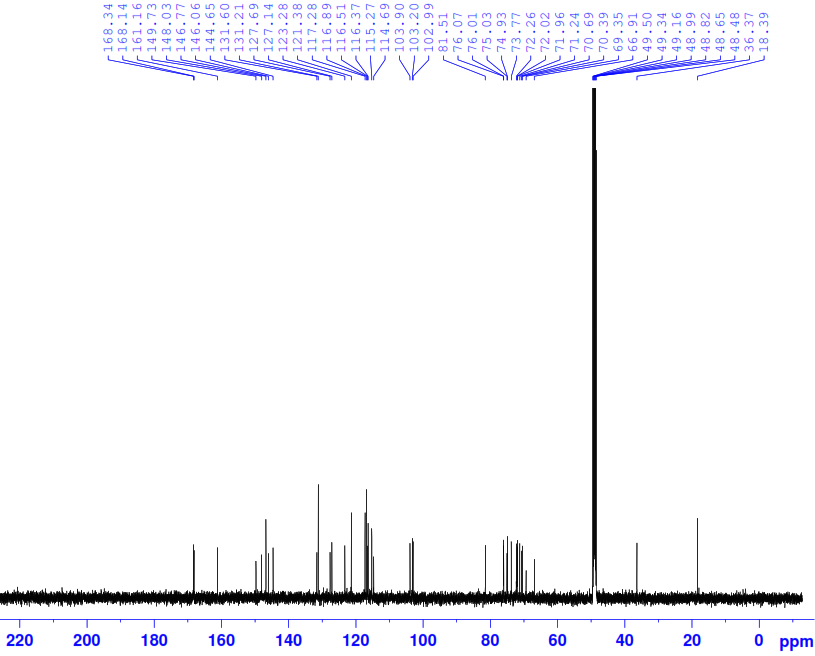


# 13C-NMR spectrum of compound **1** (Zoomed)


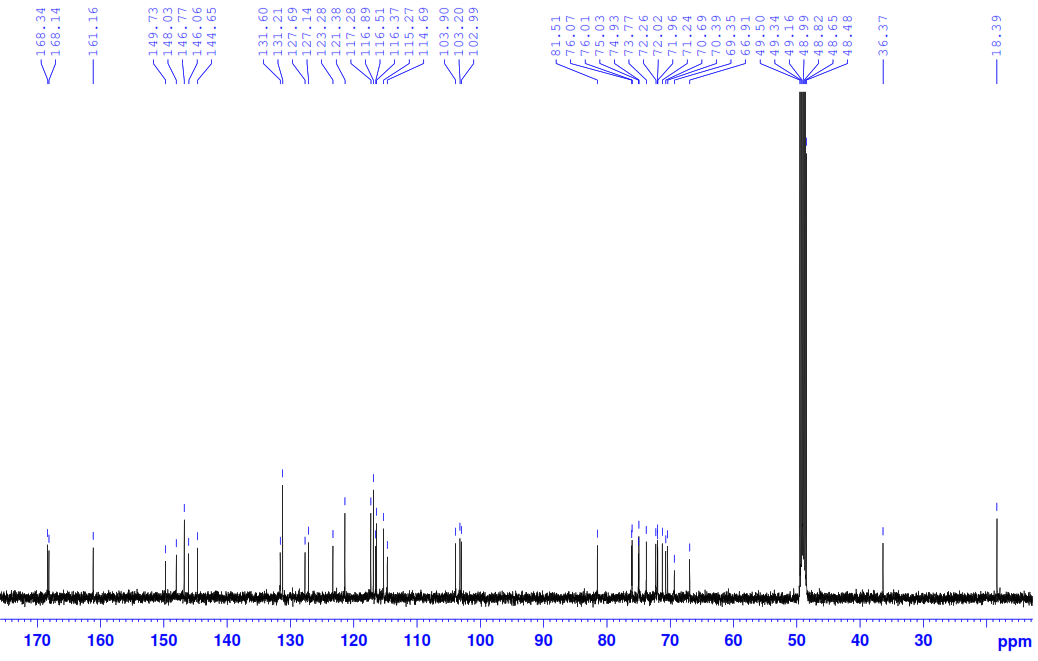


# DEPT spectrum of compound **1**


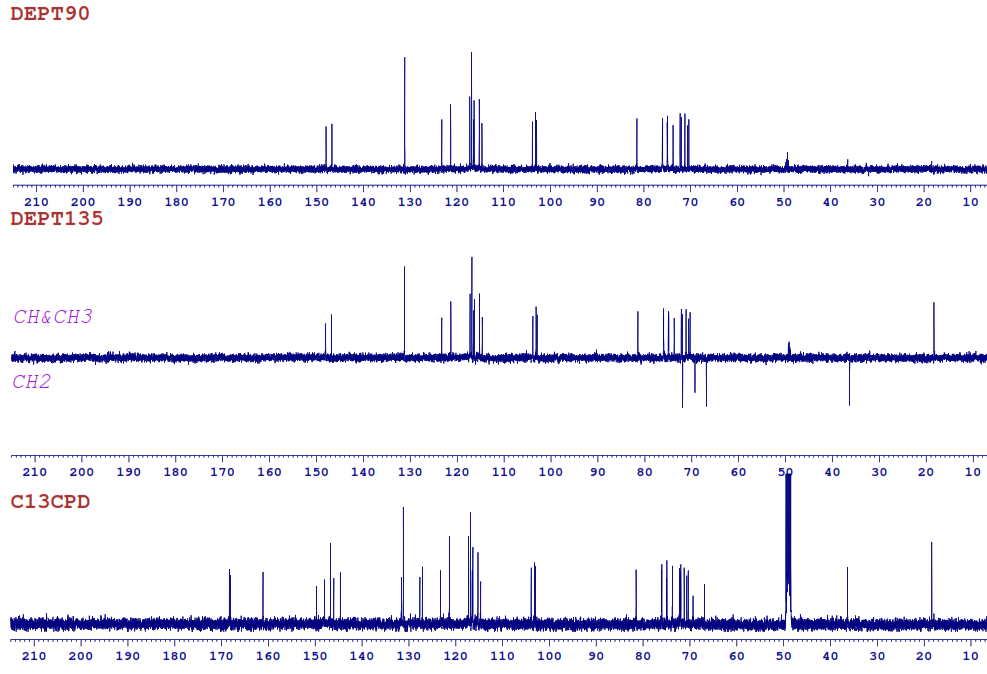


# HSQC spectrum of compound **1**


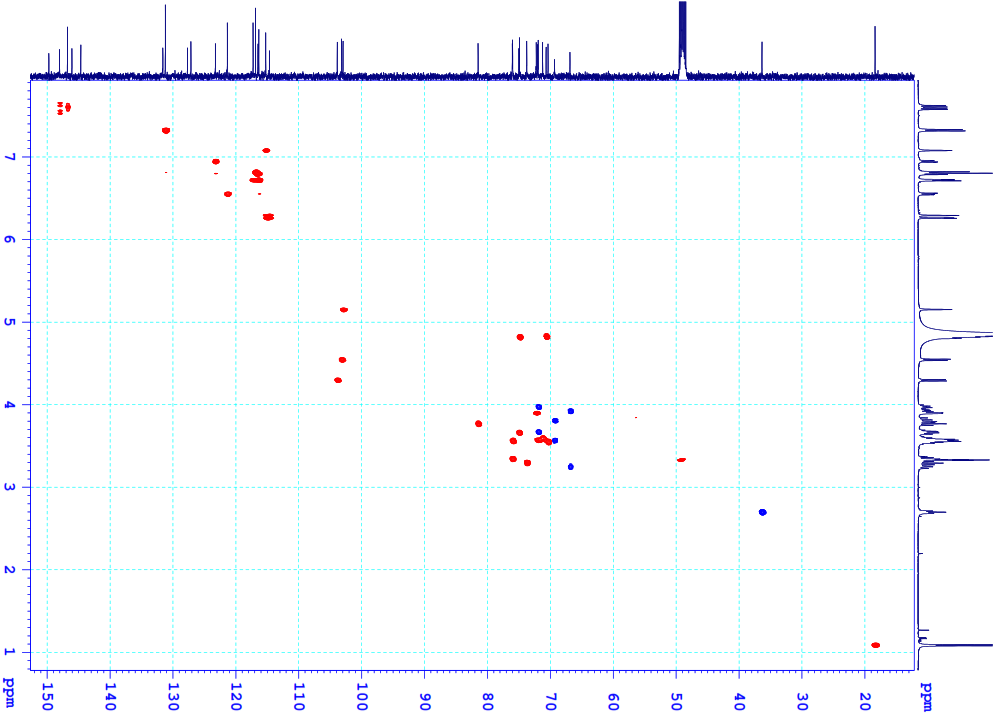


# HMBC spectrum of compound **1**


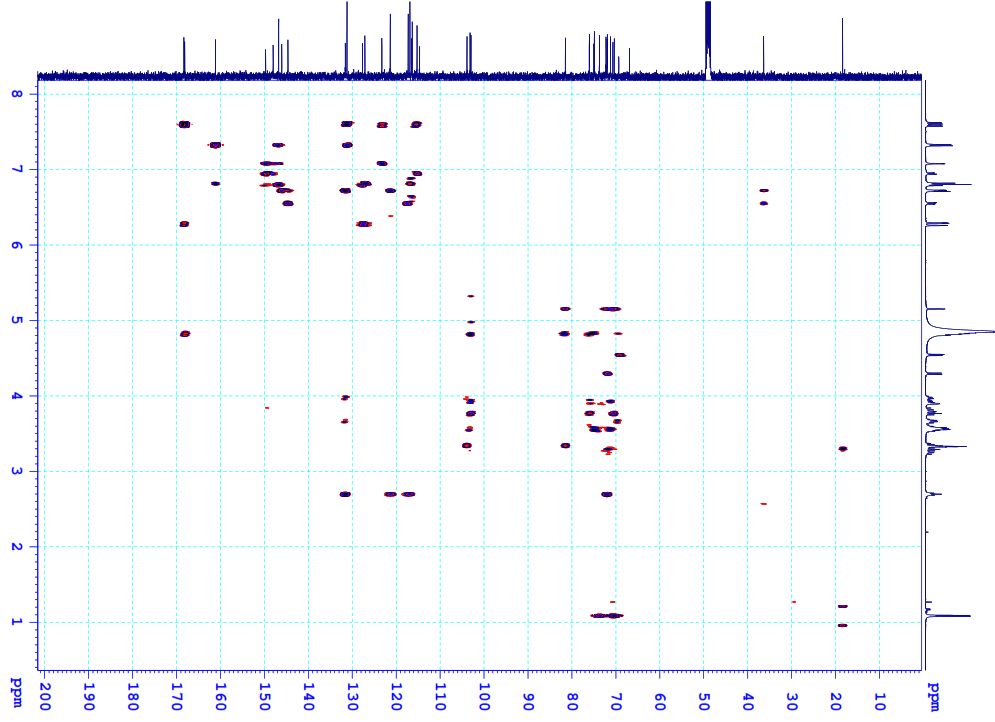


# COSY spectrum of compound **1**


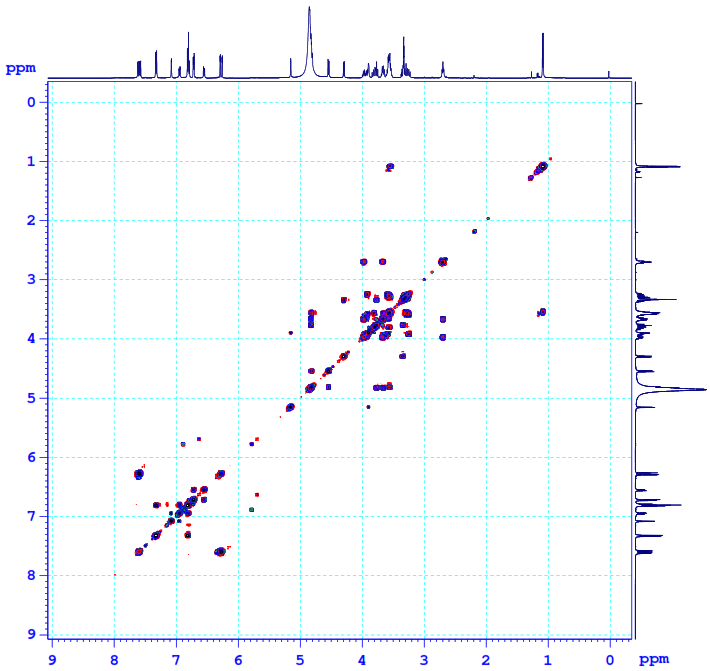


# NOESY spectrum of compound **1**


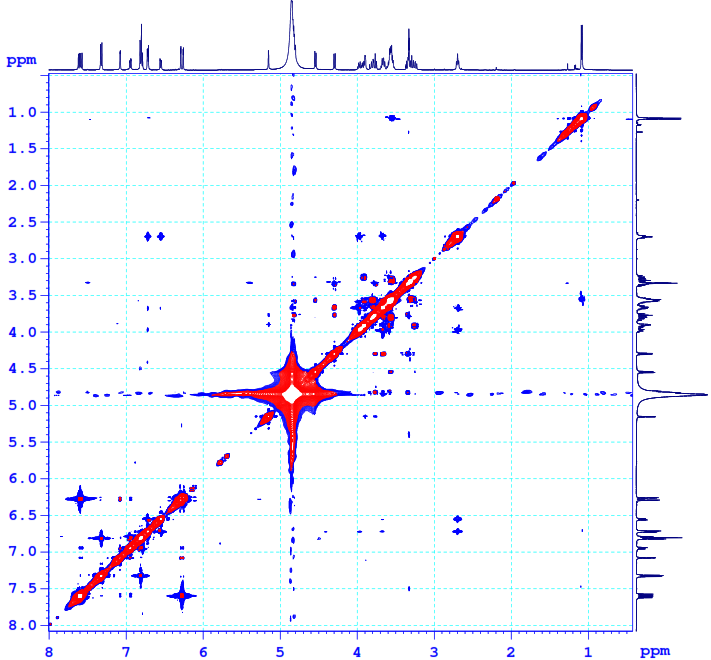

Supplement: Supplementary file 1 [file 31581156]
